# Supplementary material for: A polymer-coated template-confinement CsPbBr3 perovskite quantum dot composite
Source: Royal Society of Chemistry journal article supplement (doi:10.1039/d1nr00201e), 2021-01-01
Supplement: d1nr00201e1.pdf [file d1nr00201e1.pdf]

**Electronic Supplementary Information for:**

**Polymer coated template confinement CsPbBr<sub>3</sub> perovskite quantum  
dots composite**

Jianhua Shen,<sup>a</sup> Yu Wang,<sup>a</sup> Yihua Zhu,<sup>a,\*</sup> Yiqing Gong,<sup>a</sup> and Chunzhong Li<sup>b,\*</sup>

*<sup>a</sup> Shanghai Engineering Research Centre of Hierarchical Nanomaterials, Key Laboratory for Ultrafine Materials of Ministry of Education, Frontiers Science Centre for Materiobiology and Dynamic Chemistry, School of Materials Science and Engineering, East China University of Science and Technology, Shanghai 200237, China.*

*<sup>b</sup> Shanghai Engineering Research Centre of Hierarchical Nanomaterials, School of Chemical Engineering, East China University of Science and Technology, Shanghai 200237, China.*

\*Corresponding author. E-mail: yhzhu@ecust.edu.cn; czli@ecust.edu.cn

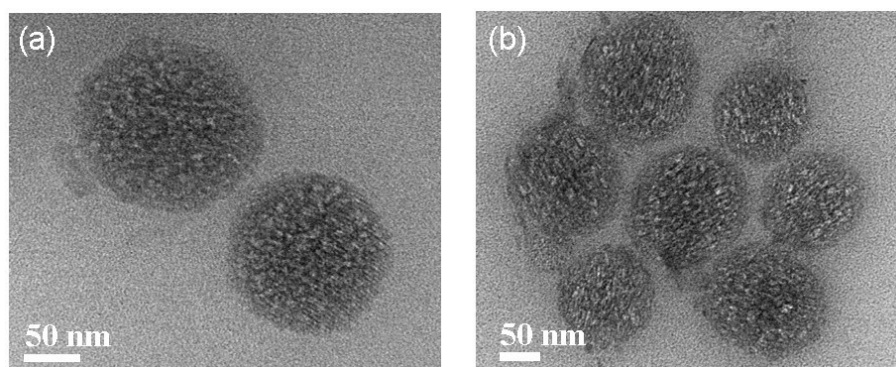

**Fig. S1** TEM images of (a) CsPbBr<sub>3</sub>@SiO<sub>2</sub> and (b) CsPbBr<sub>3</sub>@SiO<sub>2</sub>/CLA.

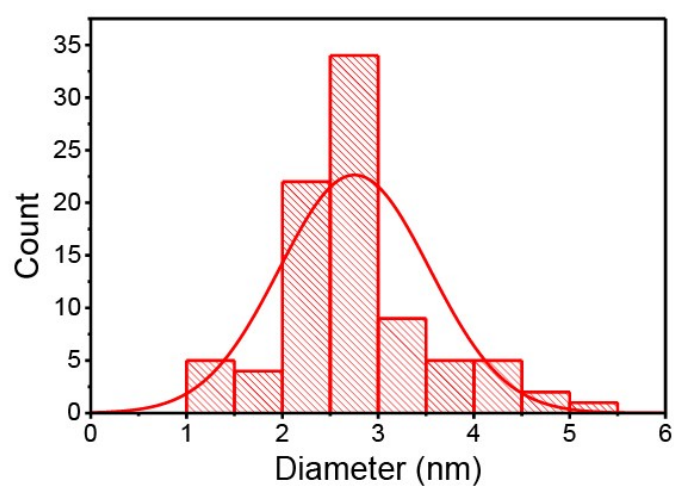

**Fig. S2** Size distribution of CsPbBr<sub>3</sub> QDs in mesoporous SiO<sub>2</sub> microspheres.

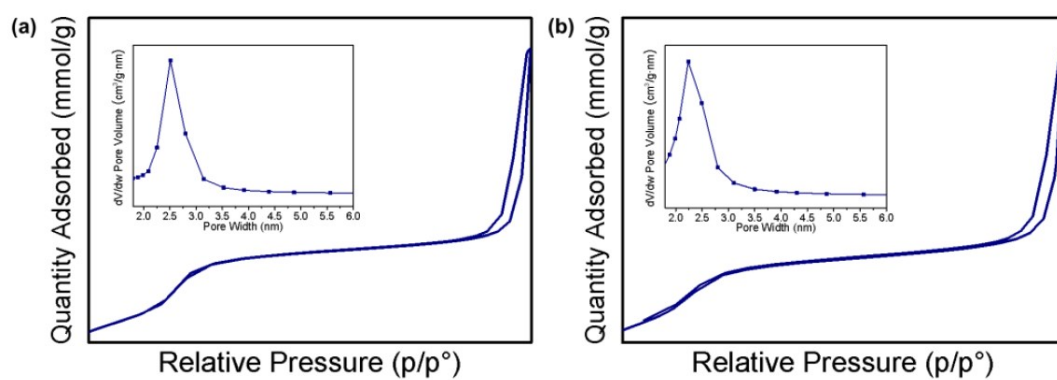

**Fig. S3** Adsorption-desorption curve and BJH pore diameter distribution of (a) SiO<sub>2</sub> and (b) CsPbBr<sub>3</sub>@SiO<sub>2</sub>.

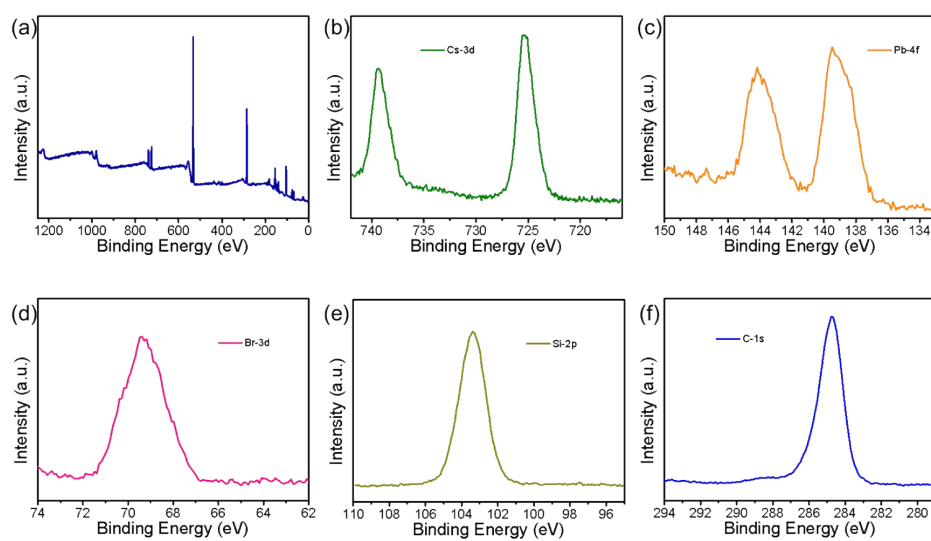

**Fig. S4** XPS analysis of (a) CsPbBr<sub>3</sub>@SiO<sub>2</sub>/Poly-CLA and zoom-in scans highlighting of (b–f) Cs, Pb, Br, Si, and C elements.

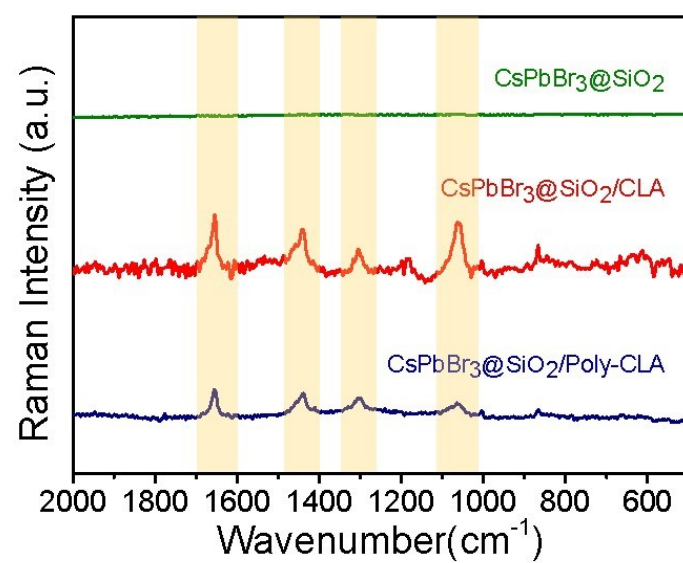

**Fig. S5** Raman spectra of CsPbBr<sub>3</sub>@SiO<sub>2</sub>, CsPbBr<sub>3</sub>@SiO<sub>2</sub>/CLA and CsPbBr<sub>3</sub>@SiO<sub>2</sub>/Poly-CLA.

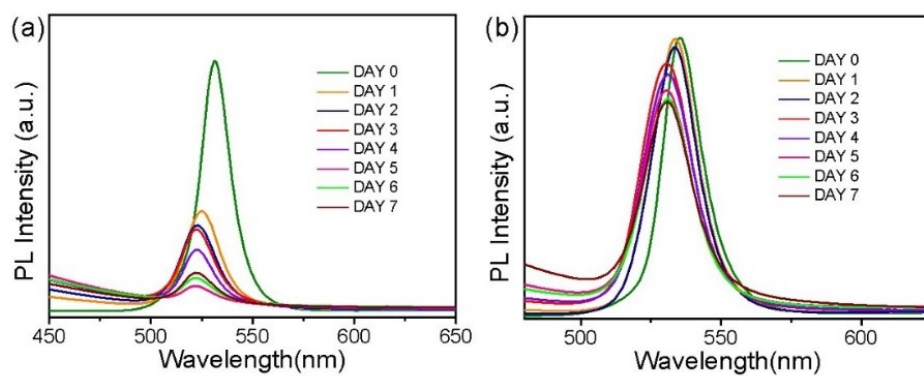

**Fig. S6** PL emission of (a) CsPbBr<sub>3</sub>@SiO<sub>2</sub>/CLA and (b) CsPbBr<sub>3</sub>@SiO<sub>2</sub>/Poly-CLA in water.

**Table S1** BET surface area and BJH cumulative volume of pores of mesoporous SiO<sub>2</sub> microspheres and CsPbBr<sub>3</sub>@SiO<sub>2</sub>.

| Sample                                | BET Surface Area<br>(m <sup>2</sup> /g) | BJH cumulative volume of pores<br>(m <sup>3</sup> /g) |
|---------------------------------------|-----------------------------------------|-------------------------------------------------------|
| SiO <sub>2</sub>                      | 1,093.42                                | 1.60                                                  |
| CsPbBr <sub>3</sub> @SiO <sub>2</sub> | 724.53                                  | 1.09                                                  |
